# Supplementary material
Source: PubMed Central journal article supplement (PMC8715349)
Supplement: jama-e2122208-s001.pdf [file jama-e2122208-s001.pdf]

## Supplemental Online Content

Wang L, Peng W, Zhao Z, et al. Prevalence and Treatment of Diabetes in China, 2013-2018. *JAMA*. doi:10.1001/jama.2021.22208

**eTable 1.** Outcome rate calculator of the 2013-2014 and 2018-2019 China Chronic Disease and Risk Factors Surveillance surveys according to American Association for Public Opinion Research (AAPOR)

**eTable 2.** Absolute % increase in weighted prevalence (%; 95% confidence interval) of diabetes (based on different measures) in Chinese adults in the 2013-2014 and 2018-2019 surveys

**eTable 3.** Absolute % increase in weighted prevalence (%; 95% confidence interval) of prediabetes (based on different measures) in Chinese adults in the 2013-2014 and 2018-2019 surveys

This supplemental material has been provided by the authors to give readers additional information about their work.

**eTable 1. Outcome rate calculator of the 2013-2014 and 2018-2019 China Chronic Disease and Risk Factors Surveillance surveys according to American Association for Public Opinion Research (AAPOR)**

|                                                                 | <b>2013</b> | <b>2019</b> |
|-----------------------------------------------------------------|-------------|-------------|
| <b>Interview (Category 1)</b>                                   |             |             |
| Complete (all versions)                                         | 179347      | 184509      |
| Partial (all versions)                                          | 1655        | 882         |
| <b>Eligible, non-interview (Category 2)</b>                     |             |             |
| Refusal and breakoff (phone, IPHH, mail, mail_U)                | 2517        | 252         |
| Refusal (phone, IPHH, mail, web)                                | 686         | 236         |
| Household-level refusal (phone, IPHH, mail, web)                | 1910        | 2867        |
| Known-respondent refusal (phone, IPHH, mail, web)               | 121         | 340         |
| Implicit refusal (phone, mail, mail_U)                          |             |             |
| Break off/ Implicit refusal (phone, mail, web, mail_U)          |             |             |
| Non-contact (phone, IPHH, mail, web, mail_U)                    | 3497        | 862         |
| Respondent unavailable during field period (IPHH, mail, mail_U) | 2125        | 417         |
| Other, non-refusals (phone, IPHH, mail, web, mail_U)            | 209         | 241         |
| <b>Total sample used</b>                                        |             |             |
| I=Complete Interviews                                           | 179347      | 184509      |
| P=Partial Interviews                                            | 1655        | 882         |
| R=Refusal and break off                                         | 5234        | 3695        |
| NC=Non Contact                                                  | 5622        | 1279        |
| O=Other                                                         | 209         | 241         |
| <b>Response Rate 1</b>                                          |             |             |
| $I/(I+P) + (R+NC+O) + (UH+UO)$                                  | 0.934       | 0.968       |
| <b>Response Rate 2</b>                                          |             |             |
| $(I+P)/(I+P) + (R+NC+O) + (UH+UO)$                              | 0.942       | 0.973       |
| <b>Response Rate 3</b>                                          |             |             |
| $I/((I+P) + (R+NC+O) + e(UH+UO))$                               | 0.934       | 0.968       |
| <b>Response Rate 4</b>                                          |             |             |
| $(I+P)/((I+P) + (R+NC+O) + e(UH+UO))$                           | 0.942       | 0.973       |

|                                           |       |       |
|-------------------------------------------|-------|-------|
|                                           |       |       |
| <b>Cooperation Rate 1</b>                 |       |       |
| $I/((I+P)+R+O)$                           | 0.962 | 0.975 |
| <b>Cooperation Rate 2</b>                 |       |       |
| $(I+P)/((I+P)+R+O)$                       | 0.971 | 0.979 |
| <b>Cooperation Rate 3</b>                 |       |       |
| $I/((I+P)+R)$                             | 0.963 | 0.976 |
| <b>Cooperation Rate 4</b>                 |       |       |
| $(I+P)/((I+P)+R)$                         | 0.972 | 0.980 |
|                                           |       |       |
| <b>Refusal Rate 1</b>                     |       |       |
| $R/((I+P)+(R+NC+O) + UH + UO)$            | 0.027 | 0.019 |
| <b>Refusal Rate 2</b>                     |       |       |
| $R/((I+P)+(R+NC+O) + e(UH + UO))$         | 0.027 | 0.019 |
| <b>Refusal Rate 3</b>                     |       |       |
| $R/((I+P)+(R+NC+O))$                      | 0.027 | 0.019 |
| <b>Contact Rate 1</b>                     |       |       |
| $((I+P)+R+O) / ((I+P)+R+O+NC+ (UH + UO))$ | 0.971 | 0.993 |
| <b>Contact Rate 2</b>                     |       |       |
| $((I+P)+R+O) / ((I+P)+R+O+NC + e(UH+UO))$ | 0.971 | 0.993 |
| <b>Contact Rate 3</b>                     |       |       |
| $((I+P)+R+O) / ((I+P)+R+O+NC)$            | 0.971 | 0.993 |

**eTable 2 Absolute % increase in weighted prevalence (%; 95% confidence interval)<sup>a</sup> of diabetes (based on different measures) in Chinese adults in the 2013-2014 and 2018-2019 surveys**

|                          | Diabetes based on information with diagnosed diabetes, FPG, 2-Hour PG, or HbA <sub>1c</sub> <sup>b</sup> | Diabetes based on information with diagnosed diabetes, FPG or 2-Hour PG <sup>c</sup> | Diabetes based on FPG <sup>d</sup> | Diabetes diagnosed based on self-report <sup>e</sup> |
|--------------------------|----------------------------------------------------------------------------------------------------------|--------------------------------------------------------------------------------------|------------------------------------|------------------------------------------------------|
| <b>All</b>               | 1.4<br>(0.7-2.2)                                                                                         | 1.6<br>(0.8-2.3)                                                                     | 1.1<br>(0.4-1.7)                   | 0.6<br>(0.1-1.0)                                     |
| <b>Gender</b>            |                                                                                                          |                                                                                      |                                    |                                                      |
| Men                      | 1.6<br>(0.7-2.5)                                                                                         | 1.8<br>(0.9-2.8)                                                                     | 1.1<br>(0.4-1.9)                   | 0.4<br>(0.0-0.9)                                     |
| Women                    | 1.3<br>(0.4-2.1)                                                                                         | 1.3<br>(0.5-2.1)                                                                     | 1.0<br>(0.3-1.7)                   | 0.7<br>(0.2-1.1)                                     |
| <b>Age group (years)</b> |                                                                                                          |                                                                                      |                                    |                                                      |
| 18-29                    | 0.0<br>(-1.3-1.3)                                                                                        | 0.0<br>(-1.2-1.2)                                                                    | -0.0<br>(-1.2-1.1)                 | -0.4<br>(-0.9-0.2)                                   |
| 30-39                    | -0.4<br>(-1.3-0.5)                                                                                       | -0.3<br>(-1.2-0.5)                                                                   | -0.5<br>(-1.3-0.3)                 | -0.2<br>(-0.6-0.3)                                   |
| 40-49                    | 0.6<br>(-0.3-1.5)                                                                                        | 0.8<br>(-0.1-1.7)                                                                    | -0.1<br>(-0.9-0.7)                 | 0.1<br>(-0.4-0.6)                                    |
| 50-59                    | 3.1<br>(2.0-4.1)                                                                                         | 3.4<br>(2.3-4.4)                                                                     | 2.7<br>(1.8-3.7)                   | 1.0<br>(0.3-1.7)                                     |
| 60-69                    | 4.1<br>(2.8-5.4)                                                                                         | 4.3<br>(2.9-5.6)                                                                     | 3.3<br>(2.2-4.4)                   | 2.4<br>(1.5-3.3)                                     |
| 70+                      | 6.6<br>(4.6-8.6)                                                                                         | 6.7<br>(4.7-8.8)                                                                     | 5.4<br>(3.9-6.9)                   | 3.3<br>(2.2-4.4)                                     |
| <b>Residence</b>         |                                                                                                          |                                                                                      |                                    |                                                      |
| Urban                    | 0.5<br>(-0.7-1.7)                                                                                        | 0.6<br>(-0.5-1.8)                                                                    | 0.2<br>(-0.8-1.2)                  | -0.2<br>(-0.9-0.5)                                   |
| Rural                    | 2.1<br>(1.1-3.0)                                                                                         | 2.2<br>(1.2-3.2)                                                                     | 1.6<br>(0.8-2.4)                   | 1.0<br>(0.6-1.4)                                     |

Abbreviations: FPG, fasting plasma glucose; PG, postprandial glucose; HbA<sub>1c</sub>, hemoglobin A<sub>1c</sub>.

<sup>a</sup> Weighted prevalence to be representative of the Chinese population. Linear regression models were fit to test significance of absolute % increase (absolute % increase = % in 2018- % in 2013).

<sup>b</sup> Diabetes was defined as participants with self-reported diabetes diagnosed by a health professional or with a fasting plasma glucose level of 126 mg/dL or greater, or a 2-hour plasma glucose level of 200 mg/dL or greater after 75-gram oral glucose challenge, or HbA<sub>1c</sub> level of 6.5% (48 mmol/mol) or greater.

<sup>c</sup> Diabetes was defined as participants with self-reported diabetes diagnosed by a health professional or a fasting plasma glucose level of 126 mg/dL or greater, or a 2-hour plasma glucose level of 200 mg/dL or greater after 75-gram oral glucose challenge.

<sup>d</sup> Diabetes was defined as participants with a fasting plasma glucose level of 126 mg/dL or greater.

<sup>e</sup> Diabetes was defined as participants with self-reported diabetes diagnosed by a health professional.

**eTable 3 Absolute % increase in weighted prevalence (%; 95% confidence interval)<sup>a</sup> of prediabetes (based on different measures) in Chinese adults in the 2013-2014 and 2018-2019 surveys**

|                          | Prediabetes based on FPG, 2-Hour PG, or HbA <sub>1c</sub> <sup>b</sup> | Prediabetes based on FPG or 2-Hour PG <sup>c</sup> | Prediabetes based on FPG <sup>d</sup> |
|--------------------------|------------------------------------------------------------------------|----------------------------------------------------|---------------------------------------|
| <b>All</b>               | 2.3<br>(-0.1-4.7)                                                      | 4.3<br>(1.7-6.9)                                   | 4.4<br>(1.6-7.3)                      |
| <b>Gender</b>            |                                                                        |                                                    |                                       |
| Men                      | 4.8<br>(2.2-7.3)                                                       | 6.3<br>(3.6-9.1)                                   | 6.5<br>(3.5-9.4)                      |
| Women                    | -0.1(-2.6-2.4)                                                         | 2.2<br>(-0.5-4.9)                                  | 2.4<br>(-0.4-5.3)                     |
| <b>Age group (years)</b> |                                                                        |                                                    |                                       |
| 18-29                    | 1.1<br>(-2.3-4.5)                                                      | 2.7<br>(-0.8-6.3)                                  | 2.1<br>(-1.4-5.5)                     |
| 30-39                    | 2.1<br>(-0.9-5.2)                                                      | 3.0<br>(-0.1-6.0)                                  | 2.8<br>(-0.3-6.0)                     |
| 40-49                    | 2.5<br>(-0.3-5.2)                                                      | 4.6<br>(1.7-7.5)                                   | 4.8<br>(1.7-7.9)                      |
| 50-59                    | 3.9<br>(1.7-6.1)                                                       | 6.0<br>(3.4-8.6)                                   | 6.8<br>(4.1-9.6)                      |
| 60-69                    | 2.4<br>(0.5-4.4)                                                       | 5.4<br>(3.0-7.8)                                   | 6.6<br>(3.9-9.4)                      |
| 70+                      | 2.4<br>(0.0-4.9)                                                       | 6.3<br>(3.5-9.1)                                   | 7.4<br>(4.2-10.5)                     |
| <b>Residence</b>         |                                                                        |                                                    |                                       |
| Urban                    | 2.2<br>(-0.8-5.2)                                                      | 3.7<br>(0.4-7.0)                                   | 3.7<br>(0.4-7.1)                      |
| Rural                    | 2.8<br>(-0.2-5.8)                                                      | 5.2<br>(1.9-8.4)                                   | 5.4<br>(1.7-9.0)                      |

Abbreviations: FPG, fasting plasma glucose; PG, postprandial glucose; HbA<sub>1c</sub>, hemoglobin A<sub>1c</sub>.

<sup>a</sup> Weighted prevalence to be representative of the Chinese population. Linear regression models were fit to test significance of absolute % increase (absolute % increase = % in 2018- % in 2013).

<sup>b</sup> Prediabetes was defined as participants who did not have diabetes but who had an HbA<sub>1c</sub> level of 5.7% (39 mmol/mol) to 6.4% (46 mmol/mol), or a fasting plasma glucose of 100 to 125 mg/dL, or a 2-hour plasma glucose of 140-199 mg/dL.

<sup>c</sup> Prediabetes was defined as participants who did not have diabetes but who had a fasting plasma glucose of 100 to 125 mg/dL, or a 2-hour plasma glucose of 140-199 mg/dL.

<sup>d</sup> Prediabetes was defined as participants who did not have diabetes, but who had a fasting plasma glucose of 100 to 125 mg/dL.
